# Supplementary material for: Induction of Conjugation and Zygospore Cell Wall Characteristics in the Alpine Spirogyra mirabilis (Zygnematophyceae, Charophyta): Advantage under Climate Change Scenarios?
Source: MDPI journal article supplement (doi:10.3390/plants10081740), 2021-08-23
Supplement: s1 [file s1]

## **Supplementary Tables:**

### **Induction of conjugation and zygosporic cell wall characteristics in the alpine *Spirogyra mirabilis* (Zygnematophyceae, Charophyta): Advantage under climate change scenarios?**

Plants

Charlotte Permann<sup>1</sup>, Klaus Herburger<sup>2</sup>, Martin Felhofer<sup>3</sup>, Notburga Gierlinger<sup>3</sup>, Louise A. Lewis<sup>4</sup>,  
Andreas Holzinger<sup>1\*</sup>

\*Author for correspondence: [Andreas.Holzinger@uibk.ac.at](mailto:Andreas.Holzinger@uibk.ac.at)

Department of Botany, University of Innsbruck, Functional Plant Biology, 6020 Innsbruck, Austria

**Table S1.** Comparison of the morphological characters of the isolate with *Spirogyra longata* (clade I), *Spirogyra mirabilis* (clade IV) and *Spirogyra pratensis* (clade IV) on the basis of Kadlubowska (1984), Prescott (1951), Pascher (1913) and Takano et al. (2019).

|                            |                        | Kadlubowska (1984)   |                     |                      |                   | Prescott (1951)     |                                 |                   | Pascher (1913)      |                   | Takano et al. (2019) |  |
|----------------------------|------------------------|----------------------|---------------------|----------------------|-------------------|---------------------|---------------------------------|-------------------|---------------------|-------------------|----------------------|--|
|                            | <i>S. sp. (Kühtai)</i> | <i>S. longata</i>    | <i>S. mirabilis</i> | <i>S. pratensis</i>  | <i>S. longata</i> | <i>S. mirabilis</i> | <i>S. pratensis</i>             | <i>S. longata</i> | <i>S. mirabilis</i> | <i>S. longata</i> | <i>S. mirabilis</i>  |  |
| Width                      | 23-34 µm               | 26-32 µm             | 21-33 µm            | 17-20 µm             | 20-36 µm          | 24-26-(27) µm       | 17-20 µm                        | 28-38 µm          | 18-27 µm            | 26-32 µm          | 20-26 µm             |  |
| Length                     | up to 5x length        | -                    | -                   | -                    | Up to 10x length  | Up to 10x length    | 80-95-(240) µm                  | 2-10x             | 4-10x               | 110-260 µm        | 105-270 µm           |  |
| End wall                   | plane                  | plane                | plane               | plane                | plane             | plane               | plane                           | plane             | plane               | plane             | plane                |  |
| Chloroplasts/ cell         | 1                      | 1                    | 1                   | 1(2)                 | 1                 | 1                   | 1 (2)                           | 1                 | 1                   | 1                 | 1                    |  |
| Turns/ cell                | 2-4                    | -                    | -                   | -                    | 2-5               | 4-7                 | 1-8                             | 2-5               | 4-7                 | 3-6               | 6-8                  |  |
| Conjugation type           | scalariform/ lateral   | scalariform/ lateral | scalariform         | scalariform/ lateral | -                 | -                   | -                               | -                 | -                   | scalariform       | -                    |  |
| Conjugation tube formation | both gametangia        | both gametangia      | both gamtangia      | both gametangia      | both gametangia   | both gametangia     | both gametangia                 | -                 | -                   | both gametangia   | -                    |  |
| Vegetative cell type       | not inflated           | not inflated         | not inflated        | very inflated (>60)  | not inflated      | not inflated        | not inflated                    | not inflated      | -                   | not inflated      | -                    |  |
| Gametangia shape           | inflated               | not inflated         | inflated            | inflated (>38)       | cylindrical       | inflated            | inflated                        | not inflated      | -                   | cylindrical       | -                    |  |
| Zygospore shape            | polymorph              | ellipsoid-cylindric  | ellipsoid           | ellipsoid            | (elongate)-ovate  | ovate/ ellipsoid    | ellipsoid/ subcylindrical-ovate | ovate/ flat ends  | -                   | ovate             | -                    |  |
| Zygospore width            | 27-37 µm               | 25-35 µm             | -                   | 24-36 µm             | 30-(38) µm        | 24-29 µm            | 24-36 µm                        | 28-37 µm          | -                   | 28-32 µm          | -                    |  |
| Zygospore length           | 32-61 µm               | 46-100 µm            | -                   | 50-70 µm             | 50-(83) µm        | 50-83 µm            | 50-60-(70) µm                   | 56-74 µm          | -                   | 48-74 µm          | -                    |  |
| Me surface                 | smooth                 | smooth               | smooth              | smooth               | smooth            | smooth              | smooth                          | -                 | -                   | smooth            | -                    |  |
| Me colour                  | (yellow)-brown         | brown                | yellow-brown        | yellow               | brownish          | brown               | yellow                          | light yellow      | -                   | yellow            | -                    |  |
| Suture                     | no                     | yes                  | yes                 | -                    | yes               | no                  | no                              | -                 | -                   | -                 | -                    |  |
| Points                     | 30/ 30                 | 18/ 26               | 17/ 22              | 13/ 24               | 20/ 28            | 22/ 28              | 19/ 28                          | 14/ 22            | 9/ 10               | 18/ 28            | 7/ 10                |  |
| Points (%)                 | 100                    | 69.23                | 77.27               | 54.17                | 71.43             | 78.57               | 67.86                           | 63.64             | 90                  | 64.29             | 70                   |  |
| Points average (%)         |                        | 67.15                | 79.00               | 61.02                | 67.15             | 79.00               | 61.02                           | 67.15             | 79.00               | 67.15             | 79.00                |  |
| Points Ranking             |                        | 2                    | 1                   | 3                    | 2                 | 1                   | 3                               | 2                 | 1                   | 2                 | 1                    |  |
| Nr. of misses              |                        | 2/ 13                | 1/ 11               | 3/ 12                | 2/ 14             | 1/ 14               | 2/ 14                           | 2/ 11             | 0/ 5                | 2/ 14             | 1/ 5                 |  |
| Nr. of misses (%)          |                        | 15.38                | 9.1                 | 25                   | 14.29             | 7.14                | 14.29                           | 18.18             | 0                   | 14.29             | 20                   |  |
| Misses average (%)         |                        | 15.54                | 9.06                | 19.65                | 15.54             | 9.06                | 19.65                           | 15.54             | 9.06                | 15.54             | 9.06                 |  |
| Misses Ranking             |                        | 2                    | 1                   | 3                    | 2                 | 1                   | 3                               | 2                 | 1                   |                   | 1                    |  |

**Point System**

|             |                    |       |
|-------------|--------------------|-------|
| dark green  | ■ = match          | = 2P  |
| light green | □ = light match    | = 1P  |
| white       | □ = no information | = 0P  |
| red         | ■ = no match       | = -1P |

**Table S2.** List of published *rbcl* and *atpB* gene sequences included in the present phylogenetic analysis.

| <b>Strain</b>     | <b>Species</b>                                                        | <b><i>rbcl</i></b> | <b><i>atpB</i></b> |
|-------------------|-----------------------------------------------------------------------|--------------------|--------------------|
| ARL 700           | <i>Sirogonium melanosporum</i> (Randhawa) Transeau                    | L13484             | KC779088           |
| UTEX 1985         | <i>Sirogonium sticticum</i> (Sm.) Kütz.                               | DQ015924           | KC779089           |
| RSS007            | <i>Spirogyra borgeana</i> Transeau                                    | KC779194           | KC779128           |
| RSS024            | <i>Spirogyra borgeana</i> Transeau                                    | KC779209           | KC779138           |
| RSS025            | <i>Spirogyra borgeana</i> Transeau                                    | KC779210           | KC779139           |
| RSS001            | <i>Spirogyra californica</i> Stancheva, J. D. Hall, McCourt et Sheath | KC779188           | KC779123           |
| Uki1 [=NIES-4302] | <i>Spirogyra chungkingensis</i> Jao JPS001                            | MK558136           | MK558167           |
| UTEX 2462         | <i>Spirogyra communis</i> (Hassall) Kütz.                             | DQ015932           | KC779090           |
| UTEX 1744         | <i>Spirogyra condensata</i> (Vaucher) Kütz.                           | DQ015936           | KC779091           |
| JH0425            | <i>Spirogyra croasdaleae</i> Blum                                     | KC779170           | KC779107           |
| A2F [=NIES-4303]  | <i>S. corrugata</i> Transeau JPS002                                   | MK558126           | MK558170           |
| RSS033            | <i>Spirogyra fluviatilis</i> Hilse                                    | KC779218           | KC779146           |
| UTEX 1743         | <i>Spirogyra gracilis</i> (Hassall) Kütz.                             | DQ015937           | KC779092           |
| RSS011            | <i>Spirogyra grevilleana</i> (Hassall) Kütz.                          | KC779197           | KC779130           |
| RSS017            | <i>Spirogyra grevilleana</i> (Hassall) Kütz.                          | KC779202           | KC779133           |
| UTEX 477          | <i>Spirogyra grevilleana</i> (Hassall) Kütz.                          | DQ015938           | KC779093           |
| UTEX 1742         | <i>Spirogyra juergensii</i> Kütz.                                     | DQ015939           | KC779094           |
| RSS015            | <i>Spirogyra juliana</i> Stancheva, J. D. Hall, McCourt et Sheath     | KC779200           | KC779131           |
| UTEX 1745         | <i>Spirogyra liana</i> Transeau                                       | DQ015940           | KC779095           |
| RSS031            | <i>Spirogyra longata</i> (Vaucher) Kütz.                              | KC779216           | KC779144           |
| RSS003            | <i>Spirogyra lutetiana</i> P. Petit                                   | KC779190           | KC779125           |
| RSS018            | <i>Spirogyra lutetiana</i> P. Petit                                   | KC779203           | KC779134           |
| RSS006            | <i>Spirogyra majuscula</i> Kütz.                                      | KC779193           | KC779127           |
| RSS026            | <i>Spirogyra maxima</i> (Hassall) Kütz.                               | KC779211           | KC779140           |

|                   |                                            |          |          |
|-------------------|--------------------------------------------|----------|----------|
| RSS032            | <i>Spirogyra maxima</i> (Hassall) Kütz.    | KC779217 | KC779145 |
| UTEX 2495         | <i>Spirogyra maxima</i> (Hassall) Kütz.    | DQ015941 | AF408797 |
| RSS008            | <i>Spirogyra notabilis</i> Taft            | KC779195 | KC779129 |
| JH0002            | <i>Spirogyra parvula</i> (Transeau) Czurda | KC779166 | KC779101 |
| UTEX 1746         | <i>Spirogyra pratensis</i> Transeau        | DQ015949 | KC779098 |
| UTEX 928          | <i>Spirogyra pratensis</i> Transeau        | DQ015948 | KC779097 |
| Tpx8 [=NIES-4314] | <i>S. punctata</i> Cleve JPS013            | MK558127 | MK558169 |
| JH0058            | <i>Spirogyra</i> sp.                       | DQ015954 | KC779102 |
| JH0130            | <i>Spirogyra</i> sp.                       | DQ015955 | KC779104 |
| JH0263            | <i>Spirogyra</i> sp.                       | KC779168 | KC779105 |
| JH0278            | <i>Spirogyra</i> sp.                       | KC779169 | KC779106 |
| JH0429            | <i>Spirogyra</i> sp.                       | KC779171 | KC779108 |
| JH0643            | <i>Spirogyra</i> sp.                       | KC779173 | KC779110 |
| JH0728            | <i>Spirogyra</i> sp.                       | KC779174 | KC779111 |
| JH0744            | <i>Spirogyra</i> sp.                       | KC779175 | KC779112 |
| JH0763            | <i>Spirogyra</i> sp.                       | KC779176 | KC779113 |
| JH0941            | <i>Spirogyra</i> sp.                       | KC779179 | KC779115 |
| JH0977            | <i>Spirogyra</i> sp.                       | KC779182 | KC779118 |
| JH0979            | <i>Spirogyra</i> sp.                       | KC779183 | KC779119 |
| JH0987            | <i>Spirogyra</i> sp.                       | KC779185 | KC779121 |
| RSS020            | <i>Spirogyra</i> sp.                       | KC779205 | KC779135 |
| RSS036            | <i>Spirogyra</i> sp.                       | KC779220 | KC779148 |
| T11               | <i>Spirogyra</i> sp. JPS050                | MK558113 | MK558151 |
| mit0203           | <i>Spirogyra</i> sp. JPS030                | MK558104 | MK558176 |
| mitA01            | <i>Spirogyra</i> sp. JPS031                | MK558135 | MK558186 |
| A3                | <i>Spirogyra</i> sp. JPS016                | MK558103 | MK558175 |

|           |                                             |          |          |
|-----------|---------------------------------------------|----------|----------|
| senA1602  | <i>Spirogyra</i> sp. JPS038                 | MK558108 | MK558180 |
| senA2002  | <i>Spirogyra</i> sp. JPS039                 | MK558111 | MK558150 |
| senA2303  | <i>Spirogyra</i> sp. JPS040                 | MK558138 | MK558172 |
| senB2001  | <i>Spirogyra</i> sp. JPS041                 | MK558142 | MK558185 |
| senB2603  | <i>Spirogyra</i> sp. JPS042                 | MK558120 | MK558155 |
| senB2604  | <i>Spirogyra</i> sp. JPS043                 | MK558122 | MK558145 |
| sen0102   | <i>Spirogyra</i> sp. JPS044                 | MK558110 | MK558149 |
| sen0103   | <i>Spirogyra</i> sp. JPS045                 | MK558129 | MK558181 |
| sen01505  | <i>Spirogyra</i> sp. JPS046                 | MK558130 | MK558191 |
| sen0406   | <i>Spirogyra</i> sp. JPS047                 | MK558125 | MK558156 |
| kit0101   | <i>Spirogyra</i> sp. JPS027                 | MK558118 | MK558154 |
| RSS021    | <i>Spirogyra submaxima</i> Transeau         | KC779206 | KC779136 |
| ACOI 1925 | <i>Spirogyra tenuissima</i> (Hassall) Kütz. | KC779187 | KC779099 |
| JH1015    | <i>Spirogyra tenuissima</i> (Hassall) Kütz. | KC779186 | KC779122 |
| RSS027    | <i>Spirogyra teodoresci</i> Transeau        | KC779212 | KC779141 |
| UTEX 479  | <i>Spirogyra varians</i> (Hassall) Kütz.    | DQ015951 | KC779100 |
| RSS004    | <i>Spirogyra weberi</i> Kütz.               | KC779191 | KC779126 |

**Table S3.** Cell wall probes used in the present study

| No. | Polymer class | Code     | Epitope                                          | Source      | Reference                 |
|-----|---------------|----------|--------------------------------------------------|-------------|---------------------------|
| 1   | Pectin        | 2F4      | Ca <sup>2+</sup> cross linked HG                 | PlantProbes | Liners et al. 1989        |
| 2   |               | JIM5     | Homogalactauronan with a low DE                  | PlantProbes | Willats et al. 2000       |
| 3   |               | JIM7     | Homogalactauronan with a high DE                 | PlantProbes | Willats et al. 2000       |
| 4   |               | LM19     | Methylesterified homogalactauronan (low DE)      | PlantProbes | Verherbruggen et al. 2009 |
| 5   |               | LM20     | Methylesterified homogalactauronan (high DE)     | PlantProbes | Verherbruggen et al. 2009 |
| 6   |               | INRA-RU2 | Backbone of rhamnogalacturonan I (4 units)       | INRA        | Ralet et al. 2010         |
| 7   |               | INRA-RU1 | Backbone of rhamnogalacturonan I (12 units)      | INRA        | Ralet et al. 2010         |
| 8   |               | LM5      | (1→4)-β-D-galactan                               | PlantProbes | Jones et al. 1997         |
| 9   |               | LM6      | (1→5)-α-L-arabinan                               | PlantProbes | Willats et al. 1998       |
| 10  |               | LM13     | Linearised (1→5)-α-L-arabinan                    | PlantProbes | Moller et al. 2008        |
| 11  |               | LM16     | (1→5)-α-L-arabinan, RG backbone                  | PlantProbes | Verherbruggen et al. 2009 |
| 12  |               | LM8      | Xylogalacturonan                                 | PlantProbes | Willats et al. 2004       |
| 13  | Xyloglucan    | LM15     | Xyloglucan (XXXG motif)                          | PlantProbes | Marcus et al. 2008        |
| 14  |               | LM24     | Xyloglucan (XLLG motif, weak to XXLG)            | PlantProbes | Pedersen et al. 2012      |
| 15  |               | LM25     | Xyloglucan (XXXG, XXLG, XLLG motif; also GGGGGG) | PlantProbes | Pedersen et al. 2012      |
| 16  | Xylan         | LM10     | (1→4)-β-D-xylan (low-substituted)                | PlantProbes | McCartney et al. 2005     |
| 17  |               | LM11     | (1→4)-β-D-xylan (low-substituted)/arabinoxylan)  | PlantProbes | McCartney et al. 2005     |
| 18  |               | LM23     | (1→4)-β-D-xylan/xylogalacturonan                 | PlantProbes | Pedersen et al. 2012      |
| 19  | β-glucans     | BS-400-2 | (1→3)-β-D-glucan                                 | Biosupplies | Meikle et al. 1991        |
| 20  |               | BS-400-3 | (1→3) (1→4)-β-D-glucan                           | Biosupplies | Meikle et al. 1994        |
| 21  | Mannans       | BS-400-4 | (1→4)-β-D-mannan                                 | Biosupplies | Pettolino et al. 2001     |
| 22  |               | LM21     | (1→4)-β-D-mannan/galactomannan/glucomannan       | PlantProbes | Marcus et al. 2010        |
| 23  |               | LM22     | (1→4)-β-D-mannan/glucomannan                     | PlantProbes | Marcus et al. 2010        |
| 24  | AGPs          | JIM8     | AGP (Gal-rich)                                   | PlantProbes | McCabe et al. 1997        |
| 25  |               | JIM13    | β-GlcA-(1→3)-α-GalA-(1→2)-α-Rha)                 | PlantProbes | Knox et al. 1991          |
| 26  |               | LM2      | AGP (1→6)-β-Gal with terminal β-GlcA)            | PlantProbes | Smallwood et al. 1996     |
| 27  |               | LM14     | AGP and/or pectic type II arabinogalactan        | PlantProbes | Moller et al. 2008        |
| 28  |               | MAC207   | AGP (β-GlcA-(1→3)-α-GalA-(1→2)-α-Rha)            | PlantProbes | Pennell. et al. 1989      |
| 29  | Extensins     | LM1      | Extensin (hydroxyproline-rich motif THRGP)       | PlantProbes | Smallwood et al. 1995     |
| 30  |               | LM3      | Extensin                                         | PlantProbes | Feng et al. 2014          |
| 31  |               | JIM11    | Extensin                                         | PlantProbes | Smallwood et al. 1994     |
| 32  |               | JIM12    | Extensin                                         | PlantProbes | Smallwood et al. 1994     |
| 33  |               | JIM19    | Extensin                                         | PlantProbes | Smallwood et al. 1994     |
| 34  |               | JIM20    | Extensin                                         | PlantProbes | Smallwood et al. 1994     |
| 35  | Cellulose     | CBM3a    | Crystalline cellulose                            | PlantProbes | Blake et al. 2006         |

|    |         |        |                                                                                                             |                     |                         |
|----|---------|--------|-------------------------------------------------------------------------------------------------------------|---------------------|-------------------------|
| 36 |         | CBM2a  | Crystalline cellulose                                                                                       | PlantProbes         | McLean et al. 2000      |
| 37 | Lectins | B-1005 | Concanavalin A; $\alpha$ -linked Man                                                                        | Vector Laboratories | Yue et al. 2009         |
| 38 |         | B-1015 | Soybean agglutinin; $\alpha$ - or $\beta$ -linked GalNAc                                                    | Vector Laboratories | Yue et al. 2009         |
| 39 |         | B-1025 | Wheat germ agglutinin; dimers and trimers of GlcNAc                                                         | Vector Laboratories | Yue et al. 2009         |
| 40 |         | B-1065 | <i>Ulex Europaeus</i> Agglutinin I; $\alpha$ -linked Fuc                                                    | Vector Laboratories | Yue et al. 2009         |
| 41 |         | B-1085 | <i>Ricinus communis</i> agglutinin; Gal or GalNAc residues                                                  | Vector Laboratories | Yue et al. 2009         |
| 42 |         | B-1285 | <i>Bauhinia purpurea</i> lectin; Gal- $\alpha$ -(1 $\rightarrow$ 3) GalNAc, terminal GalNAc                 | Vector Laboratories | Yue et al. 2009         |
| 43 |         | B-1305 | <i>Sambucus nigra</i> lectin; sialic acid attached to term. Gal, GalNAc                                     | Vector Laboratories | Yue et al. 2009         |
| 44 |         | B-1335 | <i>Euonymus europaeus</i> lectin; Gal- $\alpha$ -(1 $\rightarrow$ 3)-Fuc- $\alpha$ -(1 $\rightarrow$ 2)-Gal | Vector Laboratories | Opitz et al. 2007       |
| 45 |         | B-1365 | <i>Psophocarpus tetragonolobus</i> lectin; GalNAc                                                           | Vector Laboratories | McCarter et al. 2013    |
| 46 |         | B-1405 | <i>Psophocarpus tetragonolobus</i> lectin II; Gal and GalNAc                                                | Vector Laboratories | Barkhordari et al. 2004 |

## Supporting references

- Liners F, Letesson JJ, Didembourg C, et al. (1989) Monoclonal antibodies against pectin: recognition of a conformation induced by calcium. *Plant Physiol* 1:1419-1424.
- Barkhordari A, Stoddart RW, McClure SF, et al. (2004) Lectin histochemistry of normal human lung. *J Mol Histol* 35:147-156.
- Blake AW, McCartney L, Flint JE, et al. (2006) Understanding the biological rationale for the diversity of cellulose-directed carbohydrate-binding modules in prokaryotic enzymes. *J Biol Chem* 281:29321-29329.
- Feng T, Nyffenegger C, Højrup P, et al. (2014) Characterization of an extensin-modifying metalloprotease: N-terminal processing and substrate cleavage pattern of *Pectobacterium carotovorum* Prt1. *Appl Microbiol Biotechnol* 98:10077-10089.
- Jones L, Seymour GB, Knox JP (1997) Localization of pectic galactan in tomato cell walls using a monoclonal antibody specific to (1 $\rightarrow$ 4)-[ $\beta$ ]-D-galactan. *Plant Physiol* 113:1405-1412.
- Knox JP, Linstead PJ, Cooper JPC, et al. (1991) Developmentally regulated epitopes of cell surface arabinogalactan proteins and their relation to root tissue pattern formation. *Plant J* 1:317-326.
- Marcus SE, Blake AW, Benians TA, et al. (2010) Restricted access of proteins to mannan polysaccharides in intact plant cell walls. *Plant J* 64:191-203.
- Marcus SE, Verhertbruggen Y, Hervé C, et al. (2008) Pectic homogalacturonan masks abundant sets of xyloglucan epitopes in plant cell walls. *BMC Plant Biol* 8:1-12.
- McCabe PF, Valentine TA, Forsberg LS, et al. (1997) Soluble signals from cells identified at the cell wall establish a developmental pathway in carrot. *Plant Cell* 9:2225-2241.
- McCarter C, Kletter D, Tang H, et al. (2013) Prediction of glycan motifs using quantitative analysis of multi-lectin binding: Motifs on MUC 1 produced by cultured pancreatic cancer cells. *Proteomics Clin Appl* 7:632-641.
- McCartney L, Marcus SE, Knox JP (2005) Monoclonal antibodies to plant cell wall xylans and arabinoxylans. *J Histochem Cytochem* 53:543-546.
- McLean BW, Bray MR, Boraston AB, et al. (2000) Analysis of binding of the family 2a carbohydrate-binding module from *Cellulomonas fimi* xylanase 10A to cellulose: specificity and identification of functionally important amino acid residues. *Protein Eng* 13:801-809.
- Meikle PJ, Bonig I, Hoogenraad NJ, Clarke AE et al. (1991) The location of (1 $\rightarrow$ 3)- $\beta$ -glucans in the walls of pollen tubes of *Nicotiana glauca* using a (1 $\rightarrow$ 3)- $\beta$ -glucan-specific monoclonal antibody. *Planta* 185:1-8.

- Meikle PJ, Hoogenraad NJ, Bonig I et al. (1994) A (1→3, 1→4)-β-glucan-specific monoclonal antibody and its use in the quantitation and immunocytochemical location of (1→3, 1→4)-β-glucans. *Plant J* 5:1-9.
- Moller I, Marcus SE, Haeger A, et al. (2008) High-throughput screening of monoclonal antibodies against plant cell wall glycans by hierarchical clustering of their carbohydrate microarray binding profiles. *Glycoconj J* 25:37-48.
- Opitz L, Salaklang J, Büttner H, et al. (2007) Lectin-affinity chromatography for downstream processing of MDCK cell culture derived human influenza A viruses. *Vaccine* 25:939-947.
- Pedersen HL, Fangel JU, McCleary B, et al. (2012) Versatile high resolution oligosaccharide microarrays for plant glycobiology and cell wall research. *J Biol Chem* 287:39429-38.
- Pennell RI, Knox JP, Scofield GN et al. (1989) A family of abundant plasma membrane-associated glycoproteins related to the arabinogalactan proteins is unique to flowering plants. *J Cell Biol* 108:1967-1977.
- Pettolino FA, Hoogenraad NJ, Ferguson C, et al. (2001) A (1→4)-β-mannan-specific monoclonal antibody and its use in the immunocytochemical location of galactomannans. *Planta* 214:235-242.
- Ralet MC, Tranquet O, Poulain D, et al. (2010) Monoclonal antibodies to rhamnogalacturonan I backbone. *Planta* 231:1373-1383.
- Smallwood M, Beven A, Donovan N, et al. (1994) Localization of cell wall proteins in relation to the developmental anatomy of the carrot root apex. *Plant J* 5:237-246.
- Smallwood M, Martin H, Knox JP (1995) An epitope of rice threonine- and hydroxyproline-rich glycoprotein is common to cell wall and hydrophobic plasma-membrane glycoproteins. *Planta* 196:510-522.
- Smallwood M, Yates EA, Willats WG, et al. (1996) Immunochemical comparison of membrane-associated and secreted arabinogalactan-proteins in rice and carrot. *Planta* 198:452-459.
- Verhertbruggen Y, Marcus SE, Haeger A, et al. (2009) An extended set of monoclonal antibodies to pectic homogalacturonan. *Carbohydr Res* 344:1858-1862.
- Verhertbruggen Y, Marcus SE, Haeger A, et al. (2009) Developmental complexity of arabinan polysaccharides and their processing in plant cell walls. *Plant J* 59:413-425.
- Willats WGT, Limberg G, Buchholt HC, et al. (2000) Analysis of pectic epitopes recognised by hybridoma and phage display monoclonal antibodies using defined oligosaccharides, polysaccharides, and enzymatic degradation. *Carbohydr Res* 327:309-320.
- Willats WGT, Marcus SE, Knox JP (1998) Generation of a monoclonal antibody specific to (1→5)-α-L-arabinan. *Carbohydr Res* 308:149-152.
- Willats WGT, McCartney L, Steele-King CG, et al. (2004) A xylogalacturonan epitope is specifically associated with plant cell detachment. *Planta* 218:673-681.
- Yue T, Goldstein IJ, Hollingsworth MA, et al. (2009) The prevalence and nature of glycan alterations on specific proteins in pancreatic cancer patients revealed using antibody-lectin sandwich arrays. *Mol Cell Proteomics* 8:1697-1707.



**Table S4.** Antibodies used in the present study

| Primary Antibody |          |                               |             |         | Secondary Antibody |               |
|------------------|----------|-------------------------------|-------------|---------|--------------------|---------------|
| Polymere class   | Code     | Epitope                       | Source      | Isotype | Conjugate          | Source        |
| Pectin           | JIM5     | HG with low DE                | PlantProbes | IgG     | FITC               | Sigma-Aldrich |
|                  | LM6      | (1->5) $\alpha$ -L-arabinan   | PlantProbes | IgG     | FITC               | Sigma-Aldrich |
|                  | LM19     | Partially methylesterified HG | PlantProbes | IgM     | Fluorescein        | Sigma-Aldrich |
| Xyloglucan       | LM15     | Xyloglucan (XXXG motif)       | PlantProbes | IgG2c   | FITC               | Sigma-Aldrich |
|                  | LM25     | Xyloglucan                    | PlantProbes | IgM     | Fluorescein        | Sigma-Aldrich |
| Xylan            | LM10     | (1->4)- $\beta$ -D-xylan      | PlantProbes | IgG2c   | FITC               | Sigma-Aldrich |
| Mannan           | BS-400-4 | (1->4)- $\beta$ -D-mannan     | Biosupplies | IgG     | FITC               | Sigma-Aldrich |
| Extensin         | LM1      | Extensin                      | PlantProbes | IgM     | Fluorescein        | Sigma-Aldrich |
| AGPs             | JIM13    | AGP                           | PlantProbes | IgM     | Fluorescein        | Sigma-Aldrich |
